# Supplementary material
Source: HighWire-hosted journal article supplement (http://www.jrheum.org/highwire/filestream/29733/field_highwire_adjunct_files/0/141520_DataSuppl.pdf)
Supplement: 141520_DataSuppl.pdf [file 141520_DataSuppl.pdf]

## ONLINE SUPPLEMENTARY DATA

### SUPPLEMENTARY DATA 1: Search strategies

#### Embase (including Medline) 4496

('rheumatoid arthritis'/de OR ((rheuma\* NEXT/1 arthrit\*) OR (RA AND (rheuma\* OR arthrit\*))) :ab,ti) AND ('disease modifying antirheumatic drug'/exp OR (DMARD\* OR (disease NEAR/3 modif\*) OR methotrexat\* OR metotrex\* OR mexate OR amethopterin\* OR ametofterin\* OR emthexat\* OR emtrexat\* OR ledertrexat\* OR MTX OR novatrex OR rheumatex OR leflunomide OR Arava OR arabloc OR salazosulfapyridin\* OR salicylazosulfapyridin\* OR sulfasalazin\* OR Azulfidin\* OR Sulfazin\* OR Salazopyrin\* OR sulphasalazin\* OR sulphazin\* OR chloroquin\* OR aralen\* OR arthrochin\* OR nivaquin\* OR hydroxychloroquin\* OR hydroxychlorochin\* OR HCQ OR plaquenil\* OR ercoquin\* OR chlorochin\* OR quinolin\* OR quensyl\* OR penicillamin\* OR dimethylcystein\* OR cuprimin\* OR depen\* OR gold\* OR monogold\* OR aurothiomalat\* OR myochrysin\* OR tauredon\* OR organogold\* OR azathioprin\* OR azothioprin\* OR imuran\* OR immuran\* OR cyclosporin\* OR Neoral\* OR Gengraf\* OR Sandimmun\* OR CyA OR etanercept\* OR Enbrel\* OR ((TNF\* OR factor\*) NEAR/3 (block\* OR antagon\* OR anti\* OR inhibit\* OR 'fusion protein')) OR TNFis\* OR adalimumab\* OR Humira\* OR Trudexa\* OR certolizumab\* OR Cimzia\* OR CDP870 OR 'CDP 870' OR golimumab\* OR Simponi OR infliximab\* OR ((Mab OR monoclonal) NEAR/3 cA2) OR Remicade OR Avakine OR Revellex OR abatacept\* OR Oencia\* OR 'BMS 188667' OR BMS188667 OR CTLA4 OR 'CTLA 4' OR belatacept\* OR BMS224818 OR 'BMS 224818' OR Nulojix\* OR (('interleukin 1' OR interleukin1 OR 'il 1' OR II1 OR 'interleukin 6' OR interleukin6 OR 'il 6' OR II6) NEAR/3 (block\* OR antagon\* OR anti\* OR inhibit\*)) OR Anril\* OR Kineret\* OR Anakinra\* OR rituximab\* OR Mabthera OR Rituxan OR Reditux\* OR CD20 OR 'CD 20' OR tocilizumab\* OR Actemra\* OR Roactemra\* OR Atlizumab\* OR biological\* OR Tetracyclin\* OR Minocyclin\* OR Azithromycin\* OR Doxycyclin\* OR cyclophosphamid\* OR Cytoxan\* OR Endoxan\* OR tacrolimus\* OR Prograf) :ab,ti,de) AND ('drug dose reduction'/de OR 'drug dose titration'/de OR 'treatment withdrawal'/de OR ((dos\* OR treatm\* OR therap\* OR medic\*) NEAR/5 (reduc\* OR adjust\* OR withdraw\* OR withhold\* OR withheld\* OR stop\* OR taper\* OR titrat\* OR discontin\* OR cessat\* OR lower\* OR retract\* OR ceas\* OR diminish\* OR deescal\* OR 'de escalation' OR 'de escalations' OR 'de escalating' OR 'de escalate' OR 'de escalated')) :ab,ti)

#### OVID-SP (Medline)

("Arthritis, Rheumatoid"/ OR ((rheuma\* ADJ arthrit\*) OR (RA AND (rheuma\* OR arthrit\*))) :ab,ti.) AND ((DMARD\* OR (disease ADJ3 modif\*) OR methotrexat\* OR metotrex\* OR mexate OR amethopterin\* OR ametofterin\* OR emthexat\* OR emtrexat\* OR ledertrexat\* OR MTX OR novatrex OR rheumatex OR leflunomide OR Arava OR arabloc OR salazosulfapyridin\* OR salicylazosulfapyridin\* OR sulfasalazin\* OR Azulfidin\* OR Sulfazin\* OR Salazopyrin\* OR sulphasalazin\* OR sulphazin\* OR chloroquin\* OR aralen\* OR arthrochin\* OR nivaquin\* OR hydroxychloroquin\* OR hydroxychlorochin\* OR HCQ OR plaquenil\* OR ercoquin\* OR chlorochin\* OR quinolin\* OR quensyl\* OR penicillamin\* OR dimethylcystein\* OR cuprimin\* OR depen\* OR gold\* OR aurothiomalat\* OR myochrysin\* OR tauredon\* OR organogold\* OR azathioprin\* OR azothioprin\* OR imuran\* OR immuran\* OR cyclosporin\* OR Neoral\* OR Gengraf\* OR Sandimmun\* OR CyA OR etanercept\* OR Enbrel\* OR "TNFR-Fc fusion protein" OR ((TNF\* OR factor\*) ADJ3 (block\* OR antagon\* OR anti\* OR inhibit\*)) OR TNFis\* OR adalimumab\* OR Humira\* OR Trudexa\* OR certolizumab\* OR Cimzia\* OR CDP870 OR "CDP 870" OR golimumab\* OR Simponi OR infliximab\* OR ((Mab OR monoclonal) ADJ3 cA2) OR Remicade OR Avakine OR Revellex OR abatacept\* OR Oencia\* OR "BMS 188667" OR BMS188667 OR CTLA4 OR "CTLA 4" OR belatacept\* OR BMS224818 OR "BMS 224818" OR Nulojix\* OR (('interleukin 1' OR interleukin1 OR "il 1" OR II1 OR "interleukin 6" OR interleukin6 OR "il 6" OR II6) ADJ3 (block\* OR antagon\* OR anti\* OR inhibit\*)) OR Anril\* OR Kineret\* OR Anakinra\* OR rituximab\* OR Mabthera OR Rituxan OR Reditux\* OR CD20 OR "CD 20" OR tocilizumab\* OR Actemra\* OR Roactemra\* OR Atlizumab\* OR biological\* OR Tetracyclin\* OR Minocyclin\* OR Azithromycin\* OR Doxycyclin\* OR cyclophosphamid\* OR Cytoxan\* OR Endoxan\* OR tacrolimus\* OR Prograf).mp.) AND ("Dose response relationship, Drug"/ OR "Withholding Treatment"/ OR ((dos\* OR treatm\* OR therap\* OR medic\*) ADJ5 (reduc\* OR adjust\* OR withdraw\* OR withhold\* OR withheld\* OR stop\* OR taper\* OR titrat\* OR discontin\* OR cessat\* OR lower\* OR retract\* OR ceas\* OR diminish\* OR (de ADJ escalat\*))) :ab,ti.)

#### Cochrane Central

((rheuma\* NEXT/1 arthrit\*) OR (RA AND (rheuma\* OR arthrit\*))) :ab,ti) AND ((DMARD\* OR (disease NEAR/3 modif\*) OR methotrexat\* OR metotrex\* OR mexate OR amethopterin\* OR ametofterin\* OR emthexat\* OR emtrexat\* OR ledertrexat\* OR MTX OR novatrex OR rheumatex OR leflunomide OR Arava OR arabloc OR salazosulfapyridin\* OR salicylazosulfapyridin\* OR sulfasalazin\* OR Azulfidin\* OR Sulfazin\* OR Salazopyrin\* OR sulphasalazin\* OR sulphazin\* OR chloroquin\* OR aralen\* OR arthrochin\* OR nivaquin\* OR hydroxychloroquin\* OR hydroxychlorochin\* OR HCQ OR plaquenil\* OR ercoquin\* OR chlorochin\* OR quinolin\* OR quensyl\* OR penicillamin\* OR dimethylcystein\* OR cuprimin\* OR depen\* OR gold\* OR monogold\* OR aurothiomalat\* OR myochrysin\* OR tauredon\* OR organogold\* OR azathioprin\* OR azothioprin\* OR imuran\* OR immuran\* OR cyclosporin\* OR Neoral\* OR Gengraf\* OR Sandimmun\* OR CyA OR etanercept\* OR Enbrel\* OR ((TNF\* OR factor\*) NEAR/3 (block\* OR antagon\* OR anti\* OR inhibit\* OR 'fusion protein')) OR TNFis\* OR adalimumab\* OR Humira\* OR Trudexa\* OR certolizumab\* OR Cimzia\* OR CDP870 OR "CDP 870" OR golimumab\* OR Simponi OR infliximab\* OR ((Mab OR monoclonal) NEAR/3 cA2) OR Remicade OR Avakine OR Revellex OR abatacept\* OR Oencia\* OR "BMS 188667" OR BMS188667 OR CTLA4 OR "CTLA 4" OR belatacept\* OR BMS224818 OR "BMS 224818" OR Nulojix\* OR (('interleukin 1' OR interleukin1 OR "il 1" OR II1 OR "interleukin 6" OR

Online supplement to: Flare Rate in Patients with Rheumatoid Arthritis in Low Disease Activity or Remission Tapering or Stopping Synthetic or Biologic DMARD: A Systematic Review. *The Journal of Rheumatology*. doi:10.3899/jrheum.141520

interleukin6 OR "il 6" OR Il6) NEAR/3 (block\* OR antagonist\* OR anti\* OR inhibit\*) OR Anril\* OR Kineret\* OR Anakinra\* OR rituximab\* OR Mabthera OR Rituxan OR Reditux\* OR CD20 OR "CD 20" OR tocilizumab\* OR Actemra\* OR Roactemra\* OR Atlizumab\* OR biological\* OR Tetracyclin\* OR Minocyclin\* OR Azithromycin\* OR Doxycyclin\* OR cyclophosphamid\* OR Cytoxan\* OR Endoxan\* OR tacrolimus\* OR Prograf):ab,ti,kw) AND (((dos\* OR treat\* OR therap\* OR medic\*) NEAR/5 (reduc\* OR adjust\* OR withdraw\* OR withhold\* OR withheld\* OR stop\* OR taper\* OR titrat\* OR discontin\* OR cessat\* OR lower\* OR retract\* OR ceas\* OR diminish\* OR deescal\* OR "de escalation" OR "de escalations" OR "de escalating" OR "de escalate" OR "de escalated"))):ab,ti)

#### PubMed

((((rheuma\*[tiab] AND arthrit\*[tiab]) OR (RA[tiab] AND (rheuma\*[tiab] OR arthrit\*[tiab]))) AND ((DMARD\*[tiab] OR (disease[tiab] AND modif\*[tiab]) OR methotrexat\*[tiab] OR metotrex\*[tiab] OR mexate OR amethopterin\*[tiab] OR amethopterin\*[tiab] OR emthexat\*[tiab] OR emtrexat\*[tiab] OR ledertrexat\*[tiab] OR MTX[tiab] OR novatrex[tiab] OR rheumatrex[tiab] OR leflunomide[tiab] OR Arava[tiab] OR arabloc[tiab] OR salazosulfapyridin\*[tiab] OR salicylazosulfapyridin\*[tiab] OR sulfasalazin\*[tiab] OR Azulfidin\*[tiab] OR Sulfazin\*[tiab] OR Salazopyrin\*[tiab] OR sulphasalazin\*[tiab] OR sulphazin\*[tiab] OR chloroquin\*[tiab] OR aralen\*[tiab] OR arthrochin\*[tiab] OR nivaquin\*[tiab] OR hydroxychloroquin\*[tiab] OR hydroxychlorochin\*[tiab] OR HCQ OR plaquenil\*[tiab] OR ercoquin\*[tiab] OR chlorochin\*[tiab] OR quinolin\*[tiab] OR quensyl\*[tiab] OR penicillamin\*[tiab] OR dimethylcystein\*[tiab] OR cuprimin\*[tiab] OR depen\*[tiab] OR gold[tiab] OR aurothiomalat\*[tiab] OR myochrysin\*[tiab] OR tauredon\*[tiab] OR organogold\*[tiab] OR azathioprin\*[tiab] OR azothioprin\*[tiab] OR imuran\*[tiab] OR immuran\*[tiab] OR cyclosporin\*[tiab] OR Neoral\*[tiab] OR Gengraf\*[tiab] OR Sandimmun\*[tiab] OR CyA OR etanercept\*[tiab] OR Enbrel\*[tiab] OR TNFR-Fc fusion protein[tiab] OR ((TNF\*[tiab] OR factor\*[tiab]) AND (block\*[tiab] OR antagonist\*[tiab] OR anti\*[tiab] OR inhibit\*[tiab])) OR TNFis\*[tiab] OR adalimumab\*[tiab] OR Humira\*[tiab] OR Trudexa\*[tiab] OR certolizumab\*[tiab] OR Cimzia\*[tiab] OR CDP870 OR CDP 870 OR golimumab\*[tiab] OR Simponi[tiab] OR infliximab\*[tiab] OR ((Mab[tiab] OR monoclonal[tiab]) AND cA2[tiab]) OR Remicade[tiab] OR Avakine[tiab] OR Revellex[tiab] OR abatacept\*[tiab] OR Orencia\*[tiab] OR BMS 188667[tiab] OR BMS188667[tiab] OR CTLA4[tiab] OR CTLA 4[tiab] OR belatacept\*[tiab] OR BMS224818[tiab] OR BMS 224818[tiab] OR Nulojix\*[tiab] OR ((interleukin 1[tiab] OR interleukin1[tiab] OR il 1[tiab] OR Il1[tiab] OR interleukin 6[tiab] OR interleukin6[tiab] OR il 6[tiab] OR Il6[tiab]) AND (block\*[tiab] OR antagonist\*[tiab] OR anti\*[tiab] OR inhibit\*[tiab])) OR Anril\*[tiab] OR Kineret\*[tiab] OR Anakinra\*[tiab] OR rituximab\*[tiab] OR Mabthera[tiab] OR Rituxan[tiab] OR Reditux\*[tiab] OR CD20[tiab] OR CD 20[tiab] OR tocilizumab\*[tiab] OR Actemra\*[tiab] OR Roactemra\*[tiab] OR Atlizumab\*[tiab] OR biological\*[tiab] OR Tetracyclin\*[tiab] OR Minocyclin\*[tiab] OR Azithromycin\*[tiab] OR Doxycyclin\*[tiab] OR cyclophosphamid\*[tiab] OR Cytoxan\*[tiab] OR Endoxan\*[tiab] OR tacrolimus\*[tiab] OR Prograf)) AND (((dos\*[tiab] OR treatm\*[tiab] OR therap\*[tiab] OR medic\*[tiab]) AND (reduc\*[tiab] OR adjust\*[tiab] OR withdraw\*[tiab] OR withhold\*[tiab] OR withheld\*[tiab] OR stop\*[tiab] OR taper\*[tiab] OR titrat\*[tiab] OR discontin\*[tiab] OR cessat\*[tiab] OR lower\*[tiab] OR retract\*[tiab] OR ceas\*[tiab] OR diminish\*[tiab] OR (de escalat\*[tiab]))) AND (publisher[sb] OR 2012/11/20:3000[mhda])

#### SUPPLEMENTARY DATA 2: Modification to Downs and Black's list<sup>1</sup> used for Quality assessment

Available from the authors on request.

**SUPPLEMENTARY DATA 3: Quality Assessment**

**sDMARD**

|              | (2)<br>Luis<br>1999 | (3)<br>Fleischmann<br>2005 | (4)<br>Heimans<br>2013       | (5)<br>ten Wolde<br>1996 |
|--------------|---------------------|----------------------------|------------------------------|--------------------------|
| Flare rate   | 8%                  | 42%                        | 35%                          | 37%                      |
| Study design | RCT                 | single-arm                 | single-arm                   | RCT                      |
| DMARD        | conventional        | conventional               | conventional/<br>TNF-blocker | conventional             |
| 1            | yes                 | Partially                  | yes                          | yes                      |
| 2            | no                  | Yes                        | yes                          | yes                      |
| 3            | partially           | Yes                        | yes                          | partially                |
| 4            | yes                 | Yes                        | yes                          | yes                      |
| 5            | partly              | Partially                  | yes                          | yes                      |
| 6            | yes                 | Yes                        | yes                          | yes                      |
| 7            | xxxxxxxxxxxx        | xxxxxxxxxxxx               | xxxxxxxxxxxx                 | xxxxxxxxxxxx             |
| 8            | yes                 | Yes                        | NA                           | yes                      |
| 9            | yes                 | Unclear                    | no                           | yes                      |
| 10           | xxxxxxxxxxxx        | xxxxxxxxxxxx               | xxxxxxxxxxxx                 | xxxxxxxxxxxx             |
| 11           | yes                 | Yes                        | yes                          | yes                      |
| 12           | unclear             | unclear                    | unclear                      | unclear                  |
| 13           | yes                 | Yes                        | yes                          | yes                      |
| 14           | no                  | NA                         | no                           | yes                      |
| 15           | yes                 | Unclear                    | yes                          | yes                      |
| 16           | xxxxxxxxxxxx        | xxxxxxxxxxxx               | xxxxxxxxxxxx                 | xxxxxxxxxxxx             |
| 17a          | yes                 | NA                         | yes                          | yes                      |
| 17b          | yes                 | Yes                        | yes                          | yes                      |
| 17c          | NA                  | NA                         | yes                          | NA                       |
| 18           | yes                 | Yes                        | yes                          | yes                      |
| 19           | unclear             | Unclear                    | unclear                      | unclear                  |
| 20           | yes                 | Yes                        | yes                          | yes                      |
| 21           | yes                 | NA                         | yes                          | yes                      |
| 22           | yes                 | NA                         | yes                          | yes                      |
| 23           | yes                 | NA                         | yes                          | yes                      |
| 24           | partly              | NA                         | yes                          | Yes                      |
| 25           | xxxxxxxxxxxx        | xxxxxxxxxxxx               | xxxxxxxxxxxx                 | Xxxxxxxxxxxxx            |
| 26           | yes                 | Yes                        | yes                          | Yes                      |
| 27           | no                  | yes                        | no                           | Yes                      |

**TNF inhibitors 1/2**

|              | (6)<br>Maneiro<br>2013 | (7)<br>Harigai<br>2012 | (8)<br>van der Maas<br>2012 | (9)<br>Brocq<br>2009 | (10)<br>Tanaka<br>2010 | (11)<br>van den Broek<br>2011 | (12)<br>Smolen<br>2013 |
|--------------|------------------------|------------------------|-----------------------------|----------------------|------------------------|-------------------------------|------------------------|
| Flare rate   | 19.1%                  | 54%                    | 54%                         | 63%                  | 40%                    | 20%                           | 57.4% ; 20.9%          |
| Study design | cohort                 | cohort                 | single-arm                  | single-arm           | single-arm             | single-arm                    | RCT                    |
| DMARD        | TNF-blocker            | TNF-blocker            | TNF-blocker                 | TNF-blocker          | TNF-blocker            | TNF-blocker                   | TNF-blocker            |
|              | moderate               | moderate               | moderate                    | moderate             | good                   | good                          | good                   |
| 1            | unclear                | Yes                    | Yes                         | Yes                  | Yes                    | Partially                     | partly                 |
| 2            | yes                    | Yes                    | Yes                         | Yes                  | Yes                    | Yes                           | yes                    |
| 3            | yes                    | Yes                    | Yes                         | Yes                  | Partially              | Yes                           | yes                    |
| 4            | yes                    | Yes                    | Yes                         | Yes                  | Yes                    | Yes                           | yes                    |
| 5            | unclear                | Partially              | Yes                         | Yes                  | Yes                    | Yes                           | yes                    |
| 6            | yes                    | Yes                    | Yes                         | Yes                  | Yes                    | Yes                           | yes                    |
| 7            | xxxxxxxxxxxx           | xxxxxxxxxxxx           | xxxxxxxxxxxx                | xxxxxxxxxxxx         | xxxxxxxxxxxx           | xxxxxxxxxxxx                  | xxxxxxxxxxxx           |
| 8            | yes                    | No                     | Yes                         | Yes                  | Yes                    | Yes                           | yes                    |
| 9            | yes                    | Unclear*               | Unclear*                    | Unclear*             | Partially              | Unclear*                      | no                     |
| 10           | xxxxxxxxxxxx           | xxxxxxxxxxxx           | xxxxxxxxxxxx                | xxxxxxxxxxxx         | xxxxxxxxxxxx           | xxxxxxxxxxxx                  | xxxxxxxxxxxx           |
| 11           | unclear                | Yes                    | Yes                         | Partially            | Unclear                | Yes                           | unclear                |
| 12           | unclear                | unclear                | unclear                     | unclear              | Unclear                | unclear                       | unclear                |
| 13           | unclear                | Yes                    | Yes                         | Yes                  | Yes                    | Yes                           | yes                    |
| 14           | no                     | NA                     | NA                          | NA                   | NA                     | NA                            | yes                    |
| 15           | no                     | Unclear                | Unclear                     | Unclear              | Partially              | Unclear                       | yes                    |
| 16           | xxxxxxxxxxxx           | xxxxxxxxxxxx           | xxxxxxxxxxxx                | xxxxxxxxxxxx         | xxxxxxxxxxxx           | xxxxxxxxxxxx                  | xxxxxxxxxxxx           |
| 17a          | NA                     | NA                     | NA                          | NA                   | NA                     | NA                            | yes                    |
| 17b          | yes                    | Yes                    | Yes                         | Yes                  | Yes                    | Yes                           | yes                    |
| 17c          | NA                     | NA                     | NA                          | Yes                  | Yes                    | Yes                           | yes                    |
| 18           | yes                    | Yes                    | Yes                         | Yes                  | Yes                    | Yes                           | yes                    |
| 19           | unclear                | Unclear                | Unclear                     | Unclear              | Unclear                | Unclear                       | yes                    |
| 20           | yes                    | Yes                    | Yes                         | Yes                  | Yes                    | Yes                           | yes                    |
| 21           | NA                     | Yes                    | NA                          | NA                   | NA                     | NA                            | yes                    |
| 22           | NA                     | Yes                    | NA                          | NA                   | NA                     | NA                            | yes                    |
| 23           | NA                     | No                     | NA                          | NA                   | NA                     | NA                            | yes                    |
| 24           | NA                     | NA                     | NA                          | NA                   | NA                     | NA                            | yes                    |
| 25           | xxxxxxxxxxxx           | xxxxxxxxxxxx           | xxxxxxxxxxxx                | xxxxxxxxxxxx         | xxxxxxxxxxxx           | xxxxxxxxxxxx                  | xxxxxxxxxxxx           |
| 26           | yes                    | Unclear*               | Unclear*                    | Unclear*             | Unclear                | Unclear*                      | unclear                |
| 27           | no                     | no                     | no                          | no                   | yes                    | yes                           | yes                    |

TNF inhibitors 2/2

|              | (13)<br>Smolen<br>2014 | (14)<br>Kavanaugh<br>2014 | (15)<br>Raffener<br>2014 |
|--------------|------------------------|---------------------------|--------------------------|
| Flare rate   | 19%                    | 26.60%                    | 11%                      |
| Study design | RCT                    | observational             | RCT                      |
| DMARD        | TNF-blocker            | TNF-blocker               | TNF-blocker              |
|              | good                   | good                      | good                     |
| 1            | Yes                    | Yes                       | Yes                      |
| 2            | Yes                    | Yes                       | Yes                      |
| 3            | Yes                    | Yes                       | Yes                      |
| 4            | Yes                    | Yes                       | Yes                      |
| 5            | Yes                    | Yes                       | Yes                      |
| 6            | Yes                    | Yes                       | Yes                      |
| 7            | xxxxxxxxxxxx           | xxxxxxxxxxxx              | xxxxxxxxxxxx             |
| 8            | Yes                    | No                        | Yes                      |
| 9            | no                     | No                        | No                       |
| 10           | xxxxxxxxxxxx           | xxxxxxxxxxxx              | xxxxxxxxxxxx             |
| 11           | yes                    | yes                       | Yes                      |
| 12           | unclear                | yes                       | unclear                  |
| 13           | Yes                    | yes                       | Yes                      |
| 14           | Yes                    | Not Applicable            | Yes                      |
| 15           | Yes                    | No                        | unclear                  |
| 16           | xxxxxxxxxxxx           | xxxxxxxxxxxx              | xxxxxxxxxxxx             |
| 17a          | Yes                    | Yes                       | Yes                      |
| 17b          | Yes                    | Yes                       | Yes                      |
| 17c          | Yes                    | Not Applicable            | Yes                      |
| 18           | Yes                    | Yes                       | Yes                      |
| 19           | Unclear                | No                        | unclear                  |
| 20           | Yes                    | Yes                       | Yes                      |
| 21           | Yes                    | Not Applicable            | Yes                      |
| 22           | Yes                    | Not Applicable            | Yes                      |
| 23           | Yes                    | Not Applicable            | Yes                      |
| 24           | Yes                    | Not Applicable            | unclear                  |
| 25           | xxxxxxxxxxxx           | xxxxxxxxxxxx              | xxxxxxxxxxxx             |
| 26           | Yes                    | No                        | unclear                  |
| 27           | Yes                    | yes                       | Yes                      |

| (16)<br>Tanaka<br>2015 | (17)<br>Iwamoto<br>2014 | (18)<br>Emery<br>2014 | (19)<br>Marks<br>2015 |
|------------------------|-------------------------|-----------------------|-----------------------|
| 40%                    | 38%                     | 21%; 46%; 64%         | 63%                   |
| cohort                 | cohort                  | RCT                   | cohort                |
| TNF-blocker            | TNF-blocker             | TNF-blocker           | TNF-blocker           |
| no pooling             | no pooling              | no pooling            | no pooling            |
| Yes                    | Yes                     | Yes                   | Yes                   |
| Yes                    | Yes                     | Yes                   | Yes                   |
| Yes                    | Yes                     | Yes                   | Partially             |
| Yes                    | Yes                     | Yes                   | Yes                   |
| Yes                    | Partially               | Yes                   | Yes                   |
| Yes                    | Yes                     | Yes                   | Yes                   |
| xxxxxxxxxxxx           | xxxxxxxxxxxx            | xxxxxxxxxxxx          | xxxxxxxxxxxx          |
| Yes                    | yes                     | Yes                   | yes                   |
| unclear                | no                      | unclear               | no                    |
| xxxxxxxxxxxx           | xxxxxxxxxxxx            | xxxxxxxxxxxx          | xxxxxxxxxxxx          |
| Yes                    | unclear                 | Yes                   | yes                   |
| Yes                    | unclear                 | Yes                   | no                    |
| Yes                    | yes                     | Yes                   | yes                   |
| No                     | no                      | Yes                   | no                    |
| No                     | Partially               | Yes                   | unclear               |
| xxxxxxxxxxxx           | xxxxxxxxxxxx            | xxxxxxxxxxxx          | xxxxxxxxxxxx          |
| Yes                    | NA                      | Yes                   | unclear               |
| Yes                    | Yes                     | Yes                   | yes                   |
| Yes                    | NA                      | no                    | NA                    |
| Yes                    | Yes                     | Yes                   | unclear               |
| unclear                | unclear                 | unclear               | unclear               |
| Yes                    | Yes                     | Yes                   | Yes                   |
| Yes                    | NA                      | Yes                   | Yes                   |
| Yes                    | NA                      | Yes                   | Yes                   |
| No                     | NA                      | Yes                   | NA                    |
| NA                     | NA                      | Yes                   | NA                    |
| xxxxxxxxxxxx           | xxxxxxxxxxxx            | xxxxxxxxxxxx          | xxxxxxxxxxxx          |
| Yes                    | unclear                 | Yes                   | no                    |
| no                     | No                      | Yes                   | no                    |

**Tocilizumab**

|              | (20)<br>Aguilar<br>2013 | (21)<br>Nishimoto<br>2014 | (22)<br>van Herwaarden<br>2014 |
|--------------|-------------------------|---------------------------|--------------------------------|
| Flare rate   | 55%                     | 86.6%                     | 41%                            |
| Study design | cohort                  | single-arm                | cohort                         |
| DMARD        | tocilizumab             | tocilizumab               | tocilizumab                    |
|              |                         |                           |                                |
| 1            | yes                     | yes                       | yes                            |
| 2            | yes                     | yes                       | yes                            |
| 3            | partially               | yes                       | yes                            |
| 4            | yes                     | yes                       | yes                            |
| 5            | partly                  | yes                       | yes                            |
| 6            | yes                     | yes                       | yes                            |
| 7            | xxxxxxxxxxxx            | xxxxxxxxxxxx              | xxxxxxxxxxxx                   |
| 8            | yes                     | yes                       | yes                            |
| 9            | no                      | yes                       | unclear                        |
| 10           | xxxxxxxxxxxx            | xxxxxxxxxxxx              | xxxxxxxxxxxx                   |
| 11           | yes                     | yes                       | yes                            |
| 12           | unclear                 | unclear                   | unclear                        |
| 13           | unclear                 | unclear                   | yes                            |
| 14           | no                      | no                        | NA                             |
| 15           | no                      | no                        | no                             |
| 16           | xxxxxxxxxxxx            | xxxxxxxxxxxx              | xxxxxxxxxxxx                   |
| 17a          | NA                      | NA                        | yes                            |
| 17b          | yes                     | yes                       | yes                            |
| 17c          | NA                      | NA                        | NA                             |
| 18           | yes                     | yes                       | yes                            |
| 19           | yes                     | unclear                   | yes                            |
| 20           | yes                     | yes                       | yes                            |
| 21           | NA                      | NA                        | NA                             |
| 22           | NA                      | NA                        | NA                             |
| 23           | NA                      | NA                        | NA                             |
| 24           | NA                      | NA                        | NA                             |
| 25           | xxxxxxxxxxxx            | xxxxxxxxxxxx              | xxxxxxxxxxxx                   |
| 26           | unclear                 | yes                       | unclear                        |
| 27           | no                      | yes                       | no                             |

**Abatacept**

|              | (23)<br>Emery<br>2015 | (24)<br>Westhovens<br>2014 | (25)<br>Takeuchi<br>2014 |
|--------------|-----------------------|----------------------------|--------------------------|
| Flare rate   | 75%; 72%; 83%         | 34%                        | 41%                      |
| Study design | single-arm            | RCT                        | cohort                   |
| DMARD        | abatacept             | abatacept                  | abatacept                |
|              |                       |                            |                          |
| Yes          | yes                   | yes                        | yes                      |
| Yes          | yes                   | yes                        | yes                      |
| Yes          | yes                   | yes                        | yes                      |
| Yes          | yes                   | yes                        | yes                      |
| Partially    | yes                   | yes                        | yes                      |
| Yes          | yes                   | yes                        | yes                      |
| xxxxxxxxxxxx | xxxxxxxxxxxx          | xxxxxxxxxxxx               | xxxxxxxxxxxx             |
| Partially    | yes                   | yes                        | yes                      |
| no           | no                    | no                         | no                       |
| xxxxxxxxxxxx | xxxxxxxxxxxx          | xxxxxxxxxxxx               | xxxxxxxxxxxx             |
| yes          | yes                   | yes                        | yes                      |
| unclear      | yes                   | no                         | no                       |
| yes          | yes                   | yes                        | yes                      |
| no           | yes                   | no                         | no                       |
| unclear      | yes                   | unclear                    | unclear                  |
| xxxxxxxxxxxx | xxxxxxxxxxxx          | xxxxxxxxxxxx               | xxxxxxxxxxxx             |
| Yes          | Yes                   | yes                        | yes                      |
| Yes          | Yes                   | yes                        | yes                      |
| no           | NA                    | yes                        | yes                      |
| Yes          | Yes                   | yes                        | yes                      |
| unclear      | Yes                   | yes                        | yes                      |
| Yes          | yes                   | yes                        | yes                      |
| Yes          | yes                   | yes                        | yes                      |
| Yes          | yes                   | yes                        | yes                      |
| no           | yes                   | no                         | no                       |
| NA           | yes                   | NA                         | NA                       |
| xxxxxxxxxxxx | xxxxxxxxxxxx          | xxxxxxxxxxxx               | xxxxxxxxxxxx             |
| unclear      | yes                   | yes                        | yes                      |
| no           | no                    | no                         | no                       |

#### SUPPLEMENTARY DATA 4

Reported flare rates among studies de-escalating TNF-blockers. Pooled estimates were calculated for studies discontinuing and tapering TNF-blockers.

| Study (arm), year                 | Medication         | Charac-<br>teristics  | Follow-up | n           | Flare rate<br>(95% CI)  |
|-----------------------------------|--------------------|-----------------------|-----------|-------------|-------------------------|
| <i>Stop</i>                       |                    |                       |           |             |                         |
| Smolen (stop), 2013 (12)          | etn                | s, a                  | 1 year    | 200         | 0.57 (0.50-0.64)        |
| Tanaka, 2010 (10)                 | ifx                | s, a                  | 1 year    | 114         | 0.45 (0.36-0.54)        |
| van den Broek, 2011 (11)          | ifx                | s, a, e               | 1 year    | 104         | 0.20 (0.13-0.29)        |
| Maneiro, 2013 (6)                 | ada, ctz, etn, ifx | s, p                  | 1 year    | 52          | 0.19 (0.11-0.32)        |
| Brocq, 2009 (9)                   | ifx, etn, ada      | s, a                  | 1 year    | 21          | 0.75 (0.53-0.89)        |
| Harigai, 2012 (7)                 | ada                | s, a                  | 1 year    | 22          | 0.55 (0.34-0.74)        |
| Smolen, 2014 (13)                 | ada                | s, a, e               | 1 year    | 102         | 0.19 (0.12-0.27)        |
| Kavanaugh, 2014 (14)              | TNFi               | s, p                  | 1 year    | 717         | 0.27 (0.24-0.30)        |
| Tanaka, 2015 (16)                 | ada                | s, a                  | 24 weeks  | 52          | 0.40 (0.28-0.54)        |
| Iwamoto, 2014 (17)                | TNFi               | s, p                  | 6 months  | 32          | 0.38 (0.23-0.55)        |
| Emery (etn stop), 2014 (18)       | etn                | s, a, e               | 39 weeks  | 65          | 0.46 (0.35-0.58)        |
| Emery (etn + MTX stop), 2014 (18) | etn                | s, a, e               | 39 weeks  | 65          | 0.62 (0.49-0.73)        |
| <b>Pooled estimate</b>            |                    |                       |           | <b>1546</b> | <b>0.38 (0.29-0.48)</b> |
| <i>Tapering</i>                   |                    |                       |           |             |                         |
| Smolen (half dose), 2013 (12)     | etn                | r <sup>1</sup> , a    | 1 year    | 202         | 0.19 (0.14-0.25)        |
| van der Maas, 2012 (8)            | ifx                | r <sup>2</sup> , p    | 1 year    | 51          | 0.55 (0.41-0.68)        |
| Heimans, 2013 (4)                 | ada                | r <sup>3</sup> , a    | 4 months  | 26          | 0.35 (0.19-0.55)        |
| Raffeiner, 2014 (15)              | etn                | r <sup>4</sup> , p    | 1 year    | 159         | 0.11 (0.07-0.17)        |
| Emery (etn half dose), 2014 (18)  | etn                | r <sup>1</sup> , a, e | 39 weeks  | 63          | 0.21 (0.12-0.32)        |
| Marks, 2015 (19)                  | TNFi               | r <sup>5</sup> , p    | 9 months  | 69          | 0.62 (0.50-0.73)        |
| <b>Pooled estimate</b>            |                    |                       |           | <b>570</b>  | <b>0.31 (0.16-0.51)</b> |

a = co-medication with sDMARDs in all patients

e = early RA

pegol

p = co-medication with sDMARDs in selected patients

r<sup>1</sup> = dose reduction: etn 50 mg/week, dose reduced to etn 25 mg/week

r<sup>2</sup> = dose reduction: ifx 3 mg/kg, tapered down 0.75 mg/kg every 8-12 weeks

r<sup>3</sup> = dose reduction: ada 40 mg/2 weeks, tapered down to MTX monotherapy  
disease modifying anti-rheumatic drugs

r<sup>4</sup> = dose reduction: etn 2x 25mg/week, dose reduced to etn 25mg/week  
inhibitor

r<sup>5</sup> = dose reduction with 1/3 (by increasing interval \*1.5)

s = stop

ada = adalimumab

ctz = certolizumab

etn = etanercept

ifx = infliximab

MTX = methotrexate

sDMARDs = synthetic

TNFi = tumor necrosis factor

## SUPPLEMENTARY DATA 5

### Risk factors for flare addressed in primary studies

Several studies looked at risk factors for flare. Six studies evaluated the effect of using concomitant sDMARD on flare risk after stopping the TNF blocker, but found no significant association<sup>8, 9, 14, 17, 19, 22</sup>. Of 3 studies<sup>9, 14, 17</sup>, 1 found a lower risk of disease flare for a longer duration of remission<sup>9</sup>. Of 12 studies evaluating the effect of disease duration<sup>5, 8-11, 14, 16, 17, 19, 21, 22</sup>, 4 found a significant association between a longer disease duration and an increased risk of flare<sup>10, 11, 16, 23</sup> and 8 found no association<sup>5, 8, 9, 14, 17, 21, 22, 25</sup>. Eleven studies assessed the effect of disease activity score on flare rate<sup>8-11, 14, 16, 17, 21-23, 25</sup>, 5 of which found a significant association for a higher disease activity score at moment of de-escalation<sup>14, 16, 21, 23, 25</sup>. Other factors that could influence flare rates that were not addressed in the primary studies are taper or stop criterion (e.g., remission or LDA), followup time, and monitoring frequency of disease activity.

### SUPPLEMENTARY REFERENCES

1. Downs SH, Black N. The feasibility of creating a checklist for the assessment of the methodological quality both of randomised and non-randomised studies of health care interventions. *J Epidemiol Community Health* 1998;52:377-84.
2. Luis M, Pacheco-Tena C, Cazarin-Barrientos J, Lino-Perez L, Goycochea MV, Vazquez-Mellado J, et al. Comparison of two schedules for administering oral low-dose methotrexate (weekly versus every-other-week) in patients with rheumatoid arthritis in remission: a twenty-four week, single blind, randomized study. *Arthritis Rheum* 1999;42:2160-5.
3. Fleischmann RM, Cohen SB, Moreland LW, Schiff M, Mease PJ, Smith DB, et al; iRAMT Study Group. Methotrexate dosage reduction in patients with rheumatoid arthritis beginning therapy with infliximab: the Infliximab Rheumatoid Arthritis Methotrexate Tapering (iRAMT) trial. *Curr Med Res Opin* 2005;21:1181-90.
4. Heimans L, Wevers-de Boer KV, Visser K, Goekoop RJ, van Oosterhout M, Harbers JB, et al. A two-step treatment strategy trial in patients with early arthritis aimed at achieving remission: the IMPROVED study. *Ann Rheum Dis* 2014;73:1356-61.
5. ten Wolde S, Breedveld FC, Hermans J, Vandenbroucke JP, van de Laar MA, Markusse HM, et al. Randomised placebo-controlled study of stopping second-line drugs in rheumatoid arthritis. *Lancet* 1996;347:347-52.
6. Maneiro JR, Perez-Pampin E, Salgado E, Carmona L, Gomez-Reino JJ. Observational study of optimization of biologic therapies in rheumatoid arthritis: a single-centre experience. *Rheumatol Int* 2014;34:1059-63.
7. Harigai M, Takeuchi T, Tanaka Y, Matsubara T, Yamanaka H, Miyasaka N. Discontinuation of adalimumab treatment in rheumatoid arthritis patients after achieving low disease activity. *Mod Rheumatol* 2012;22:814-22.
8. van der Maas A, Kievit W, van den Bernt BJ, van den Hoogen FH, van Riel PL, den Broeder AA. Down-titration and discontinuation of infliximab in rheumatoid arthritis patients with stable low disease activity and stable treatment: an observational cohort study. *Ann Rheum Dis* 2012;71:1849-54.
9. Brocq O, Millasseau E, Albert C, Grisot C, Flory P, Roux CH, et al. Effect of discontinuing TNFalpha antagonist therapy in patients with remission of rheumatoid arthritis. *Joint Bone Spine* 2009;76:350-5.
10. Tanaka Y, Takeuchi T, Mimori T, Saito K, Nawata M, Kameda H, et al; RRR study investigators. Discontinuation of infliximab after attaining low disease activity in patients with rheumatoid arthritis: RRR (remission induction by Remicade in RA) study. *Ann Rheum Dis* 2010;69:1286-91.
11. van den Broek M, Klarenbeek NB, Dirven L, van Schaardenburg D, Hulsmans HM, Kerstens PJ, et al. Discontinuation of infliximab and potential predictors of persistent low disease activity in patients with early rheumatoid arthritis and disease activity score-steered therapy: subanalysis of the BeSt study. *Ann Rheum Dis* 2011;70:1389-94.

Online supplement to: Flare Rate in Patients with Rheumatoid Arthritis in Low Disease Activity or Remission Tapering or Stopping Synthetic or Biologic DMARD: A Systematic Review. *The Journal of Rheumatology*. doi:10.3899/jrheum.141520

12. Smolen JS, Nash P, Durez P, Hall S, Ilivanova E, Irazoque-Palazuelos F, et al. Maintenance, reduction, or withdrawal of etanercept after treatment with etanercept and methotrexate in patients with moderate rheumatoid arthritis (PRESERVE): a randomised controlled trial. *Lancet* 2013;381:918-29.
13. Smolen JS, Emery P, Fleischmann R, van Vollenhoven RF, Pavelka K, Durez P, et al. Adjustment of therapy in rheumatoid arthritis on the basis of achievement of stable low disease activity with adalimumab plus methotrexate or methotrexate alone: the randomised controlled OPTIMA trial. *Lancet* 2014;383:321-32.
14. Kavanaugh A, Lee SJ, Curtis JR, Greenberg JD, Kremer JM, Soto L, et al. Discontinuation of tumour necrosis factor inhibitors in patients with rheumatoid arthritis in low-disease activity: persistent benefits. Data from the Corrona registry. *Ann Rheum Dis* 2015;74:1150-5.
15. Raffaeiner B, Botsios C, Ometto F, Bernardi L, Stramare R, Todesco S, et al. Effects of half dose etanercept (25 mg once a week) on clinical remission and radiographic progression in patients with rheumatoid arthritis in clinical remission achieved with standard dose. *Clin Exp Rheumatol* 2015;33:63-8.
16. Tanaka Y, Hirata S, Kubo S, Fukuyo S, Hanami K, Sawamukai N, et al. Discontinuation of adalimumab after achieving remission in patients with established rheumatoid arthritis: 1-year outcome of the HONOR study. *Ann Rheum Dis* 2015;74:389-95.
17. Iwamoto T, Ikeda K, Hosokawa J, Yamagata M, Tanaka S, Norimoto A, et al. Prediction of relapse after discontinuation of biologic agents by ultrasonographic assessment in patients with rheumatoid arthritis in clinical remission: high predictive values of total gray-scale and power Doppler scores that represent residual synovial inflammation before discontinuation. *Arthritis Care Res* 2014;66:1576-81.
18. Emery P, Hammoudeh M, FitzGerald O, Combe B, Martin-Mola E, Buch MH, et al. Sustained remission with etanercept tapering in early rheumatoid arthritis. *N Engl J Med* 2014;371:1781-92.
19. Marks DJ, Holroyd CR, Dimitrov BD, Armstrong RD, Calogeras DA, Cooper C, et al. Does combined clinical and ultrasound assessment allow selection of individuals with rheumatoid arthritis for sustained reduction of anti-tumor necrosis factor therapy? *Arthritis Care Res* 2015;67:746-53.
20. Aguilar-Lozano L, Castillo-Ortiz JD, Vargas-Serafin C, Morales-Torres J, Sanchez-Ortiz A, Sandoval-Castro C, et al. Sustained clinical remission and rate of relapse after tocilizumab withdrawal in patients with rheumatoid arthritis. *J Rheumatol* 2013;40:1069-73.
21. Nishimoto N, Amano K, Hirabayashi Y, Horiuchi T, Ishii T, Iwahashi M, et al. Drug free REmission/low disease activity after cessation of tocilizumab (Actemra) Monotherapy (DREAM) study. *Mod Rheumatol* 2014;24:17-25.
22. van Herwaarden N, Herfkens-Hol S, van der Maas A, van den Bemt BJ, van Vollenhoven RF, Bijlsma JW, et al. Dose reduction of tocilizumab in rheumatoid arthritis patients with low disease activity. *Clin Exp Rheumatol* 2014;32:390-4.
23. Emery P, Burmester GR, Bykerk VP, Combe BG, Furst DE, Barré E, et al. Evaluating drug-free remission with abatacept in early rheumatoid arthritis: results from the phase 3b, multicentre, randomised, active-controlled AVERT study of 24 months, with a 12-month, double-blind treatment period. *Ann Rheum Dis* 2015;74:19-26.
24. Westhovens R, Robles M, Ximenes AC, Wollenhaupt J, Durez P, Gomez-Reino J, et al. Maintenance of remission following 2 years of standard treatment then dose reduction with abatacept in patients with early rheumatoid arthritis and poor prognosis. *Ann Rheum Dis* 2015;74:564-8.
25. Takeuchi T, Matsubara T, Ohta S, Mukai M, Amano K, Tohma S, et al. Biologic-free remission of established rheumatoid arthritis after discontinuation of abatacept: a prospective, multicentre, observational study in Japan. *Rheumatology* 2015;54:683-91.
